# Supplementary material
Source: PubMed Central journal article supplement (PMC3457413)
Supplement: AAC.05385-11_zac999101245so2.pdf [file AAC.05385-11_zac999101245so2.pdf]

# Systematic Analysis of Pyrazinamide-Resistant Spontaneous Mutants and Clinical Isolates of *Mycobacterium tuberculosis*.

Karolien Stoffels, Vanessa Mathys, Maryse Fauville-Dufaux, René Wintjens, Pablo Bifani

**Supplementary Table 1:** Selection of spontaneous mutants (CDC1551) on 7H11 plates, pH6.0 and 100 or 500 µg/ml PZA from 39 (40-1 excluded) independent culture flasks.

| culture number | PZA 500 µg/ml             |                 |                 | PZA 100 µg/ml             |                 |                 | difference in # colonies (100-500µg) 10 <sup>7</sup> *** | difference in # colonies (100-500µg) 10 <sup>5</sup> ** |
|----------------|---------------------------|-----------------|-----------------|---------------------------|-----------------|-----------------|----------------------------------------------------------|---------------------------------------------------------|
|                | Number of bacteria plated |                 |                 | Number of bacteria plated |                 |                 |                                                          |                                                         |
|                | 10 <sup>7</sup>           | 10 <sup>5</sup> | 10 <sup>3</sup> | 10 <sup>7</sup>           | 10 <sup>5</sup> | 10 <sup>3</sup> |                                                          |                                                         |
| 1              | 110                       | 0               | 0               | 123                       | 0               | 0               | 13                                                       | 0                                                       |
| 2              | 87                        | 0               | 0               | 200                       | 2               | 0               | 113                                                      | 2                                                       |
| 3              | 84                        | 1               | 0               | 105                       | 4               | 0               | 21                                                       | 3                                                       |
| 4              | 191                       | 0               | 0               | 200                       | 3               | 0               | 9                                                        | 3                                                       |
| 5              | 75                        | 0               | 0               | 200                       | 0               | 0               | 125                                                      | 0                                                       |
| 6              | 37                        | 0               | 0               | 105                       | 10              | 0               | 68                                                       | 10                                                      |
| 7              | 78                        | 1               | 0               | 96                        | 1               | 0               | 18                                                       | 0                                                       |
| 8              | 83                        | 0               | 0               | 82                        | 3               | 0               | -1                                                       | 3                                                       |
| 9              | 184                       | 1               | 0               | 71                        | 1               | 0               | -113                                                     | 0                                                       |
| 10             | 94                        | 1               | 0               | 133                       | 0               | 0               | 39                                                       | -1                                                      |
| 11             | 130                       | 2               | 0               | 167                       | 4               | 0               | 37                                                       | 2                                                       |
| 12             | 113                       | 1               | 0               | 200                       | 1               | 0               | 87                                                       | 0                                                       |
| 13             | 101                       | 0               | 0               | 108                       | 0               | 0               | 7                                                        | 0                                                       |
| 14             | 101                       | 0               | 0               | 123                       | 0               | 0               | 22                                                       | 0                                                       |
| 15             | 117                       | 0               | 0               | 105                       | 0               | 0               | -12                                                      | 0                                                       |
| 16             | 119                       | 1               | 0               | 158                       | 0               | 0               | 39                                                       | -1                                                      |
| 17             | 95                        | 0               | 0               | 106                       | 0               | 0               | 11                                                       | 0                                                       |
| 18             | 34                        | 2               | 0               | 84                        | 0               | 0               | 50                                                       | -2                                                      |
| 19             | 106                       | 0               | 0               | 94                        | 1               | 0               | -12                                                      | 1                                                       |
| 20             | 149                       | 1               | 0               | 191                       | 3               | 0               | 42                                                       | 2                                                       |
| 21             | 106                       | 0               | 0               | 200                       | 1               | 0               | 94                                                       | 1                                                       |
| 22             | 92                        | 2               | 0               | 181                       | 3               | 0               | 89                                                       | 1                                                       |
| 23             | 184                       | 4               | 0               | 200                       | 8               | 0               | 16                                                       | 4                                                       |
| 24             | 100                       | 0               | 0               | 102                       | 2               | 0               | 2                                                        | 2                                                       |
| 25             | 134                       | 1               | 0               | 139                       | 2               | 0               | 5                                                        | 1                                                       |
| 26             | 95                        | 0               | 0               | 123                       | 2               | 0               | 28                                                       | 2                                                       |
| 27             | 87                        | 0               | 0               | 141                       | 1               | 0               | 54                                                       | 1                                                       |
| 28             | 61                        | 0               | 0               | 98                        | 1               | 0               | 37                                                       | 1                                                       |
| 29             | 98                        | 0               | 0               | 180                       | 1               | 0               | 82                                                       | 1                                                       |
| 30             | 94                        | 2               | 0               | 220                       | 3               | 0               | 126                                                      | 1                                                       |
| 31             | 107                       | 0               | 0               | 115                       | 0               | 0               | 8                                                        | 0                                                       |
| 33             | 115                       | 1               | 0               | 133                       | 0               | 0               | 18                                                       | -1                                                      |
| 34             | 118                       | 0               | 0               | 200                       | 2               | 0               | 82                                                       | 2                                                       |
| 35             | 113                       | 0               | 0               | 135                       | 1               | 1               | 22                                                       | 1                                                       |
| 36             | 107                       | 0               | 0               | 150                       | 0               | 0               | 43                                                       | 0                                                       |
| 37             | 99                        | 0               | 0               | 150                       | 1               | 0               | 51                                                       | 1                                                       |
| 38             | 109                       | 1               | 0               | 152                       | 5               | 0               | 43                                                       | 4                                                       |
| 39             | 64                        | 1               | 0               | 163                       | 0               | 0               | 99                                                       | -1                                                      |
| 40             | 84                        | 0               | 0               | 96                        | 1               | 0               | 12                                                       | 1                                                       |
| Total          | 4055                      | 23              | 0               | 5529                      | 67              | 1               |                                                          |                                                         |
| Average        | <b>103,97</b>             | <b>0,59</b>     | <b>0,00</b>     | <b>141,77</b>             | <b>1,72</b>     | <b>0,03</b>     | <b>38</b>                                                | <b>1</b>                                                |
| Median         | 101                       | 0               | 0               | 135                       | 1               | 0               | 37                                                       | 1                                                       |

\*\*\* p=6.08E-06 (Statistically significant difference, paired Student's T Test)

\*\* p=0.00114 (Statistically significant difference, paired Student's T Test)

**CONCLUSION**

~100 mutants /  $10^7$  bacteria = ~1 mutant /  $10^5$  bacteria

- mutation frequency of either  $1.5/10^5$  or  $1/10^5$  when selected at 100 or 500  $\mu\text{g/ml}$  respectively.

**Count of colonies on the petri dishes with 7H11+OADC supplement + PZA 100 or 500  $\mu\text{g/ml}$  (pH6.0)**

Inoculation : 100  $\mu\text{l}$  on 7H11 + 100 or 500  $\mu\text{g/ml}$  PZA , pH 6.0

(14Jan2010)

colony count : after 4 weeks

(11Feb2010)

**Supplementary Table 2:** Structural analysis of *Mycobacterium tuberculosis* PncA protein in relation to identified mutations in clinical isolates and PZA<sup>R</sup> spontaneous mutant strains.

A positive or negative  $\Delta\Delta\text{G}$  indicates whether the mutation is respectively thermodynamically stabilizing or destabilizing while the magnitude of  $\Delta\Delta\text{G}$  indicates the extent of the alteration.

| Selection <sup>a</sup>                        | Nucleotide mutation | Amino acid mutation | sol vacc <sup>b</sup> | $\Delta\Delta\text{G}$ (CS) <sup>c</sup> | $\Delta\Delta\text{G}$ (PM) <sup>d</sup> | Comments                                                                                                                                |
|-----------------------------------------------|---------------------|---------------------|-----------------------|------------------------------------------|------------------------------------------|-----------------------------------------------------------------------------------------------------------------------------------------|
| 500                                           | T-7C                | NA                  | NA                    | NA                                       | NA                                       | Nucleotide change in promoter region                                                                                                    |
| 500                                           | G-6C                | NA                  | NA                    | NA                                       | NA                                       | Nucleotide change in promoter region                                                                                                    |
| 500                                           | del A-4             | NA                  | NA                    | NA                                       | NA                                       | Nucleotide deletion in promoter region                                                                                                  |
| 500 (2)                                       | T2C                 | Met1Thr             | 42.5%                 | +0.31                                    | -0.31                                    | N-terminal translation initiator Met1                                                                                                   |
| 100 (3)<br>500 (10)                           | G3C*                | Met1Ile             | 42.5%                 | -0.17                                    | +0.01                                    | N-terminal translation initiator Met1                                                                                                   |
| 100                                           | del G7*             | Ala3 fs*            | 0.0%                  | NA                                       | NA                                       | Frameshift                                                                                                                              |
| 100                                           | C8A                 | Ala3Glu             | 0.0%                  | -0.74                                    | -2.86                                    | buried residue; destabilizing mutation                                                                                                  |
| 500                                           | del T17*            | Ile6 fs*            | 0.5%                  | NA                                       | NA                                       | Frameshift                                                                                                                              |
| 500/CI                                        | G22A                | Asp8Asn             | 3.5%                  | +0.97                                    | -0.01                                    | Asp8 is a catalytic residue                                                                                                             |
| 500/CI                                        | G22T                | Asp8Tyr             | 3.5%                  | +0.95                                    | -0.28                                    | Asp8 is a catalytic residue                                                                                                             |
| CI                                            | A23C*               | Asp8Ala*            | 3.5%                  | +1.73                                    | -1.62                                    | Asp8 is a catalytic residue                                                                                                             |
| 500                                           | del G22<br>+del C24 | Asp8 fs             | 3.5%                  | NA                                       | NA                                       | Frameshift                                                                                                                              |
| 500 (4)                                       | C24A                | Asp8Glu             | 3.5%                  | +1.51                                    | 1.57                                     | Asp8 is a catalytic residue                                                                                                             |
| 100                                           | T26G                | Val9Gly             | 0.6%                  | -1.35                                    | -2.64                                    | buried residue; Gly substitution destabilizing                                                                                          |
| CI                                            | A29C                | Gln10Pro            | 0.0%                  | -2.13                                    | -1.75                                    | buried residue; Pro substitution destabilizing                                                                                          |
| CI                                            | C28T                | Gln10Stop           | 0.0%                  | NA                                       | NA                                       | early termination codon                                                                                                                 |
| 100                                           | G34A                | Asp12Asn            | 16.0%                 | -2.68                                    | -0.56                                    | buried residue; Asn substitution destabilizing                                                                                          |
| CI                                            | C39G*               | Phe13Leu*           | 12.5%                 | -0.84                                    | -1.41                                    | buried residue; Leu substitution destabilizing; Phe13 is part of PZA binding site (Unissa <i>et al</i> Bioinformatics 2009, 4(1):24-29) |
| CI (1 PZA <sup>R</sup> , 3 PZA <sup>S</sup> ) | T40G                | Cys14Gly            | 1.4%                  | +0.17                                    | -2.06                                    | buried residue; Gly substitution destabilizing                                                                                          |
| 500                                           | C42A                | Cys14Stop           | 1.4%                  | NA                                       | NA                                       | early termination codon                                                                                                                 |
| 500                                           | ins G48*            | Gly16 fs            | 100.0%                | NA                                       | NA                                       | Frameshift                                                                                                                              |
| 500                                           | ins A49*            | Gly17 fs            | 21.6%                 | NA                                       | NA                                       | Frameshift                                                                                                                              |
| 500                                           | G70C*               | Gly24Arg*           | 0.0%                  | -5.21                                    | -0.98                                    | buried residue; destabilizing mutation                                                                                                  |
| CI                                            | G71A                | Gly24Asp            | 0.0%                  | -0.34                                    | -1.40                                    | buried residue; destabilizing mutation                                                                                                  |
| 500                                           | T80C                | Leu27Pro            | 6.0%                  | -6.60                                    | -2.96                                    | buried residue; destabilizing mutation                                                                                                  |
| 500                                           | ins 86AA*           | Arg29 fs            | 62.4%                 | NA                                       | NA                                       | Frameshift                                                                                                                              |
| CI                                            | T92G                | Ile31Ser            | 0.0%                  | -3.63                                    | -3.07                                    | buried residue; destabilizing mutation                                                                                                  |
| 100/500                                       | C102A               | Tyr34Stop           | 13.6%                 | NA                                       | NA                                       | early termination codon                                                                                                                 |
| 100                                           | ins C104            | Leu35 fs            | 19.1%                 | NA                                       | NA                                       | Frameshift                                                                                                                              |
| CI                                            | T104C               | Leu35Pro            | 19.1%                 | -0.57                                    | -1.96                                    | Partially buried residue; destabilizing mutation                                                                                        |
| 100                                           | C123G               | Tyr41Stop           | 16.4%                 | NA                                       | NA                                       | early termination codon                                                                                                                 |

|                        |              |            |       |       |       |                                                                                                                                                                                   |
|------------------------|--------------|------------|-------|-------|-------|-----------------------------------------------------------------------------------------------------------------------------------------------------------------------------------|
| CI                     | A128C        | His43Pro   | 22.0% | -1.96 | -2.91 | partially buried residue; mutation destabilizing                                                                                                                                  |
| 500                    | T131A*       | Val44Asp*  | 8.5%  | -2.60 | -2.71 | buried residue; destabilizing mutation                                                                                                                                            |
| 100/CI                 | C137T        | Ala46Val   | 0.0%  | +2.28 | -0.13 | buried residue; mutation rather stabilizing                                                                                                                                       |
| 500                    | G145A        | Asp49Asn   | 4.9%  | -3.29 | -0.33 | Fe-chelating residue                                                                                                                                                              |
| 500/CI                 | A146C        | Asp49Ala   | 4.9%  | +1.41 | -0.50 | Fe-chelating residue                                                                                                                                                              |
| 100                    | C151T        | His51Tyr   | 0.5%  | +1.56 | -0.33 | Fe-chelating residue                                                                                                                                                              |
| CI                     | A152G        | His51Arg   | 0.5%  | -1.57 | -1.07 | Fe-chelating residue                                                                                                                                                              |
| CI                     | C161A        | Pro54Gln   | 5.6%  | -2.12 | -0.64 | buried residue; destabilizing mutation                                                                                                                                            |
| 500                    | del C161     | Pro54 fs   | 5.6%  | NA    | NA    | Frameshift                                                                                                                                                                        |
| 100/CI                 | del G164*    | Gly55 fs   | 48.3% | NA    | NA    | Frameshift                                                                                                                                                                        |
| 100 (2)                | C169A*       | His57Asn*  | 7.1%  | -1.89 | -1.49 | Fe-chelating residue                                                                                                                                                              |
| 500                    | A170G        | His57Arg   | 7.1%  | -0.71 | -1.04 | Fe-chelating residue                                                                                                                                                              |
| 500                    | ins A172*    | Phe58 fs   | 21.9% | NA    | NA    | Frameshift                                                                                                                                                                        |
| 100 (2)<br>500(1)/CI   | T175C        | Ser59Pro   | 32.4% | -2.60 | -1.57 | partially buried residue; destabilizing                                                                                                                                           |
| 500                    | del T175*    | Ser59 fs*  | 32.4% | NA    | NA    | Frameshift                                                                                                                                                                        |
| CI                     | A188C        | Asp63Ala   | 59.7% | -0.59 | -0.57 | solvent accessible residue; destabilizing                                                                                                                                         |
| CI                     | A188G        | Asp63Gly   | 59.7% | -0.45 | -1.16 | solvent accessible residue; destabilizing                                                                                                                                         |
| CI (PZA <sup>S</sup> ) | A191C*       | Tyr64Ser*  | 62.2% | +1.81 | -0.74 | solvent accessible residue; rather stabilizing                                                                                                                                    |
| 500 (3)                | ins A193     | Ser65 fs   | 81.1% | NA    | NA    | Frameshift                                                                                                                                                                        |
| 500                    | T199C        | Ser67Pro   | 12.8% | -0.9  | -3.18 | partially buried residue; destabilizing mutation                                                                                                                                  |
| 500                    | T202C        | Trp68Arg   | 18.3% | -1.84 | -1.68 | partially buried residue; destabilizing; Trp68 is part of PZA binding site (Unissa <i>et al</i> Bioinformatics 2009, 4(1):24-29) (Petrella <i>et al</i> PlosOne 2011:6(1):e15785) |
| 500                    | del G204*    | Trp68 fs*  | 18.3% | NA    | NA    | Frameshift                                                                                                                                                                        |
| 500/CI                 | C211T        | His71Tyr   | 2.7%  | -2.94 | -0.64 | Fe-chelating residue                                                                                                                                                              |
| CI                     | C211A        | His71Asn   | 2.7%  | +0.96 | -1.87 | Fe-chelating residue                                                                                                                                                              |
| CI                     | G215A        | Cys72Tyr   | 0.0%  | -9.28 | -0.84 | buried residue; destabilizing mutation                                                                                                                                            |
| CI                     | A226C        | Thr76Pro   | 39.6% | -1.01 | -2.28 | solvent accessible residue; destabilizing mutation                                                                                                                                |
| CI                     | C244G        | His82Asp   | 17.0% | +0.34 | -0.80 | partially buried residue; rather neutral                                                                                                                                          |
| CI                     | A245G        | His82Arg   | 17.0% | +0.04 | -0.95 | partially buried residue; rather neutral                                                                                                                                          |
| CI                     | ins CA 246*  | His82 fs   | 17.0% | NA    | NA    | Frameshift                                                                                                                                                                        |
| CI                     | T254G        | Leu85Arg   | 4.9%  | -6.06 | -1.40 | buried residue; destabilizing mutation                                                                                                                                            |
| CI                     | C260T        | Thr87Met   | 60.6% | +0.45 | -0.28 | solvent accessible residue; neutral                                                                                                                                               |
| 500                    | del G306*    | Ala102 fs  | 10.0% | NA    | NA    | Frameshift                                                                                                                                                                        |
| 500                    | T307C        | Tyr103His  | 66.4% | -0.74 | +0.08 | solvent accessible residue; neutral                                                                                                                                               |
| 500                    | C309A        | Tyr103Stop | 66.4% | NA    | NA    | early termination codon                                                                                                                                                           |
| CI                     | C309G        | Tyr103Stop | 66.4% | NA    | NA    | early termination codon                                                                                                                                                           |
| 500/100                | C312A*       | Ser104Arg  | 0.0%  | -0.95 | -1.95 | buried residue; destabilizing; found to significantly reduce activity (Lemaitre <i>et al</i> Biochem J 2001; 535:453-458)                                                         |
| CI                     | G319T*       | Glu107Stop | 50.4% | NA    | NA    | early termination codon                                                                                                                                                           |
| 500                    | ins T322*    | Gly108 fs* | 0.0%  | NA    | NA    | Frameshift                                                                                                                                                                        |
| 100                    | del C344     | Pro115 fs  | 36.6% | NA    | NA    | Frameshift                                                                                                                                                                        |
| CI                     | T347C        | Leu116Pro  | 0.0%  | +1.77 | -2.11 | buried residue; neutral mutation                                                                                                                                                  |
| 500                    | del C367*    | Arg123 fs* | 42.4% | NA    | NA    | Frameshift                                                                                                                                                                        |
| 100                    | ins G372*    | Gly124 fs* | 45.7% | NA    | NA    | Frameshift                                                                                                                                                                        |
| 100                    | Del 385-401* | Asp129 fs  | 0.0%  | NA    | NA    | Frameshift                                                                                                                                                                        |
| CI                     | Ins GG391    | Val131 fs  | 0.0%  | NA    | NA    | Frameshift                                                                                                                                                                        |
| 500 (2)                | G395T        | Gly132Val  | 0.0%  | -2.54 | -0.85 | buried residue; destabilizing; active site region                                                                                                                                 |
| 500                    | C401T        | Ala134Val  | 8.2%  | +1.07 | -0.40 | buried residue; part of catalytic site (Petrella <i>et al</i> PlosOne 2011:6(1):e15785)                                                                                           |
| 500                    | del C402     | Ala134 fs  | 8.2%  | NA    | NA    | Frameshift                                                                                                                                                                        |
| CI (PZA <sup>S</sup> ) | A403C        | Thr135Pro  | 2.9%  | +1.05 | -0.96 | buried residue; neutral mutation                                                                                                                                                  |
| 500/100                | C404A*       | Thr135Asn* | 2.9%  | -1.36 | -1.23 | buried residue; destabilizing mutation                                                                                                                                            |
| CI                     | A407G        | Asp136Gly  | 4.2%  | -1.46 | -2.07 | buried residue; destabilizing mutation                                                                                                                                            |
| 100                    | G413A        | Cys138Tyr  | 8.5%  | -3.18 | -0.93 | catalytic residue (Zhang <i>et al</i> FEBS J                                                                                                                                      |

|                                                 |                |            |       |       |       |                                                                                                                        |
|-------------------------------------------------|----------------|------------|-------|-------|-------|------------------------------------------------------------------------------------------------------------------------|
|                                                 |                |            |       |       |       | 2008:275:753-762) (Lemaitre <i>et al</i> Biochem J 2001; 535:453-458) (Petrella <i>et al</i> PlosOne 2011:6(1):e15785) |
| 500                                             | G415T*         | Val139Leu  | 0.0%  | +0.59 | -0.92 | buried residue; located near the active site pocket                                                                    |
| 500/CI                                          | T416C          | Val139Ala  | 0.0%  | -4.93 | -2.64 | buried residue; located near the active site pocket                                                                    |
| CI                                              | C418G          | Arg140Gly  | 26.6% | +0.41 | -2.26 | buried residue; rather destabilizing mutation                                                                          |
| 100                                             | C421T          | Gln141Stop | 24.1% | NA    | NA    | early termination codon                                                                                                |
| CI                                              | A422C          | Gln141Pro  | 24.1% | -1.48 | -1.93 | rather solvent accessible residue; destabilizing                                                                       |
| 100/CI                                          | C425T          | Thr142Met  | 0.0%  | +3.32 | +0.42 | buried residue; stabilizing; active site pocket                                                                        |
| 100                                             | C425A          | Thr142Lys  | 0.0%  | -6.25 | -1.36 | buried residue; destabilizing mutation                                                                                 |
| CI                                              | G427C          | Ala143Pro* | 0.0%  | -4.46 | -2.27 | buried residue; destabilizing mutation                                                                                 |
| CI (PZA <sup>S</sup> )                          | G427A          | Ala143Thr  | 0.0%  | -4.45 | -1.10 | buried residue; destabilizing mutation                                                                                 |
| CI                                              | G436A          | Ala146Thr  | 0.0%  | -3.09 | -1.21 | buried residue; destabilizing mutation                                                                                 |
| 500                                             | del 456-565*   | Ala152 fs* | 45.4% | NA    | NA    | Frameshift                                                                                                             |
| 100                                             | G461T*         | Arg154Met* | 27.1% | -2.67 | -0.10 | partially buried residue; rather destabilizing                                                                         |
| CI                                              | T464G          | Val155Gly  | 0.0%  | -3.29 | -3.91 | buried residue; destabilizing                                                                                          |
| CI                                              | ins T465       | Val155 fs  | 0.0%  | NA    | NA    | Frameshift                                                                                                             |
| 500                                             | ins G466*      | Leu156 fs  | 0.5%  | NA    | NA    | Frameshift                                                                                                             |
| 500 (2)                                         | ins T468*      | Leu156 fs  | 0.5%  | NA    | NA    | Frameshift                                                                                                             |
| 500                                             | T476C          | Leu159Pro  | 3.3%  | -3.68 | -2.70 | buried residue; destabilizing mutation                                                                                 |
| 500                                             | C512A          | Ala171Glu  | 5.4%  | -1.00 | -1.04 | buried residue; destabilizing mutation                                                                                 |
| 500                                             | del CG512-513* | Ala171 fs  | 5.4%  | NA    | NA    | Frameshift                                                                                                             |
| 500 (2)                                         | T515C          | Leu172Pro  | 27.8% | -0.53 | -3.06 | partially buried residue; destabilizing                                                                                |
| CI                                              | T515G*         | Leu172Arg* | 27.8% | -2.67 | -1.24 | partially buried residue; destabilizing                                                                                |
| CI (PZA <sup>R</sup> +PZA <sup>S</sup> )        | G525A          | Met175Ile  | 0.0%  | +0.37 | -0.80 | buried residue; neutral                                                                                                |
| CI                                              | A523G          | Met175Val  | 0.0%  | +0.33 | -1.19 | buried residue; rather destabilizing                                                                                   |
| CI                                              | del C530       | Thr177 fs  | 90.1% | NA    | NA    | Frameshift                                                                                                             |
| CI                                              | T545C          | Leu182Ser  | 26.8% | +2.82 | -1.99 | Solvent accessible residue; neutral                                                                                    |
| 100 (14)                                        | WT             | WT         | NA    | NA    | NA    | MIC PZA >400µg/ml (MGIT960 system)                                                                                     |
| CI (14 PZA <sup>R</sup> , 71 PZA <sup>S</sup> ) | WT             | WT         | NA    | NA    | NA    |                                                                                                                        |

<sup>a</sup> CI: mutation found on clinical isolate. 100 or 500: Selection of spontaneous mutant on either 100 or 500 µg/ml. If the mutation was found in more than one isolate, the number of isolates is indicated.

<sup>b</sup> relative solvent accessibility of the wild type residue computed from CUPSAT program

<sup>c</sup> predicted protein thermal stability change ( $\Delta\Delta G$  in kcal/mol) of mutation from CUPSAT program

<sup>d</sup> predicted protein stability change ( $\Delta\Delta G$  in kcal/mol) of mutation from PoPMuSiC program

NA= Not Applicable

\* previously not reported
